# Supplementary material for: SiglecF(HI) Marks Late‐Stage Neutrophils of the Infarcted Heart: A Single‐Cell Transcriptomic Analysis of Neutrophil Diversification
Source: PubMed Central journal article supplement — J Am Heart Assoc. 2021 Feb 2;10(4):e019019. doi: 10.1161/JAHA.120.019019 (PMC7955351; doi:10.1161/jaha.120.019019), 2021-02-02
Supplement: JAH3-10-e019019-s001.pdf [file JAH3-10-e019019-s001.pdf]

# **SUPPLEMENTAL MATERIAL**

**Table S1. Full list of DEGs comparing SigFHI and SigFLO neutrophils**

|             | SigF HI   |           |       | pct.2 | p_val_adj |
|-------------|-----------|-----------|-------|-------|-----------|
|             | p_val     | avg_logFC | pct.1 |       |           |
| Ppia        | 1.14E-112 | 1.2752113 | 0.884 | 0.364 | 1.86E-108 |
| Ptma        | 8.26E-81  | 1.1393449 | 0.836 | 0.393 | 1.35E-76  |
| AA467197    | 8.62E-71  | 1.4753909 | 0.703 | 0.275 | 1.40E-66  |
| Hexb        | 2.40E-57  | 1.3247778 | 0.464 | 0.079 | 3.90E-53  |
| Gngt2       | 4.46E-53  | 0.8839914 | 0.729 | 0.31  | 7.27E-49  |
| Nfkbia      | 1.26E-50  | 0.8174537 | 0.903 | 0.709 | 2.06E-46  |
| Ptgs1       | 1.10E-48  | 1.0959125 | 0.4   | 0.063 | 1.79E-44  |
| Gpx1        | 6.24E-47  | 0.7082105 | 0.874 | 0.646 | 1.02E-42  |
| Icam1       | 7.79E-46  | 1.0824787 | 0.531 | 0.16  | 1.27E-41  |
| Cox7b       | 1.50E-44  | 0.9745576 | 0.546 | 0.197 | 2.44E-40  |
| Cox6a1      | 8.00E-42  | 0.8266237 | 0.653 | 0.319 | 1.30E-37  |
| Npm1        | 6.12E-41  | 0.9687616 | 0.393 | 0.082 | 9.97E-37  |
| Minos1      | 9.06E-41  | 0.8872892 | 0.568 | 0.222 | 1.48E-36  |
| Cox7a2      | 3.28E-40  | 0.8194835 | 0.689 | 0.388 | 5.34E-36  |
| Tnf         | 1.48E-39  | 1.309528  | 0.557 | 0.233 | 2.41E-35  |
| Snrpe       | 2.04E-39  | 0.9392895 | 0.444 | 0.124 | 3.33E-35  |
| Fubp1       | 6.33E-39  | 0.928084  | 0.362 | 0.07  | 1.03E-34  |
| Hsp90aa1    | 7.57E-39  | 0.8012235 | 0.709 | 0.397 | 1.23E-34  |
| Eef1a1      | 1.05E-38  | 0.6244785 | 0.865 | 0.701 | 1.70E-34  |
| Snrpg       | 7.05E-38  | 0.8920492 | 0.39  | 0.088 | 1.15E-33  |
| Cst3        | 1.61E-37  | 0.5995831 | 0.925 | 0.801 | 2.63E-33  |
| Mat2a       | 2.90E-37  | 0.9421209 | 0.464 | 0.148 | 4.72E-33  |
| Hsp90ab1    | 4.25E-37  | 0.8397449 | 0.65  | 0.343 | 6.92E-33  |
| Siglecf     | 5.49E-36  | 0.9125827 | 0.39  | 0.094 | 8.95E-32  |
| Bcl2a1b     | 1.62E-35  | 0.743308  | 0.755 | 0.451 | 2.64E-31  |
| Banf1       | 1.81E-35  | 0.9007335 | 0.303 | 0.048 | 2.95E-31  |
| Calm1       | 3.00E-35  | 0.5511113 | 0.877 | 0.713 | 4.89E-31  |
| Snrpf       | 6.19E-35  | 0.8949078 | 0.279 | 0.034 | 1.01E-30  |
| Ran         | 6.31E-35  | 0.8617061 | 0.387 | 0.097 | 1.03E-30  |
| Serbp1      | 1.35E-34  | 0.8206222 | 0.454 | 0.152 | 2.20E-30  |
| Hint1       | 1.48E-34  | 0.8364667 | 0.435 | 0.133 | 2.42E-30  |
| Rgs10       | 1.93E-34  | 0.8895722 | 0.32  | 0.058 | 3.15E-30  |
| Mrpl52      | 6.37E-34  | 0.8853165 | 0.434 | 0.137 | 1.04E-29  |
| Sh3bgrl3    | 8.41E-34  | 0.5577637 | 0.887 | 0.754 | 1.37E-29  |
| Atp5g1      | 1.62E-33  | 0.9255905 | 0.355 | 0.087 | 2.63E-29  |
| Hilpda      | 1.65E-33  | 1.3553228 | 0.365 | 0.091 | 2.70E-29  |
| Ncf1        | 2.88E-33  | 0.5969279 | 0.82  | 0.557 | 4.70E-29  |
| Snu13       | 1.58E-32  | 0.8367146 | 0.359 | 0.091 | 2.58E-28  |
| Mrpl42      | 4.88E-32  | 0.8752497 | 0.274 | 0.04  | 7.95E-28  |
| 2010107E04F | 9.59E-32  | 0.7945051 | 0.501 | 0.203 | 1.56E-27  |
| Atp5g2      | 4.05E-31  | 0.8057457 | 0.364 | 0.097 | 6.61E-27  |

|             |          |           |       |       |          |
|-------------|----------|-----------|-------|-------|----------|
| Uqcc2       | 2.99E-30 | 0.7955425 | 0.271 | 0.043 | 4.87E-26 |
| Atp5b       | 3.02E-30 | 0.7238061 | 0.531 | 0.239 | 4.92E-26 |
| Set         | 3.15E-30 | 0.7568253 | 0.429 | 0.143 | 5.14E-26 |
| Chchd2      | 1.42E-29 | 0.5353214 | 0.814 | 0.643 | 2.32E-25 |
| 2810474019I | 1.61E-29 | 0.6136531 | 0.877 | 0.696 | 2.63E-25 |
| Uqcrb       | 2.35E-29 | 0.7983681 | 0.327 | 0.082 | 3.83E-25 |
| Uqcrq       | 5.04E-29 | 0.6869122 | 0.537 | 0.246 | 8.21E-25 |
| Naca        | 1.89E-28 | 0.6890401 | 0.563 | 0.278 | 3.08E-24 |
| Psmb3       | 2.15E-28 | 0.7404928 | 0.475 | 0.194 | 3.50E-24 |
| Atp5o.1     | 2.35E-28 | 0.8168988 | 0.307 | 0.073 | 3.83E-24 |
| Ybx1        | 4.24E-28 | 0.6737949 | 0.594 | 0.304 | 6.90E-24 |
| Elob        | 4.70E-28 | 0.6451437 | 0.703 | 0.467 | 7.65E-24 |
| Rbx1        | 5.72E-28 | 0.7174283 | 0.581 | 0.306 | 9.32E-24 |
| Arpp19      | 2.50E-27 | 0.7081519 | 0.531 | 0.26  | 4.08E-23 |
| Park7       | 3.10E-27 | 0.7583417 | 0.352 | 0.104 | 5.06E-23 |
| Sumo2       | 3.50E-27 | 0.7082082 | 0.493 | 0.215 | 5.70E-23 |
| Clec5a      | 4.60E-27 | 0.7841842 | 0.475 | 0.204 | 7.50E-23 |
| Polr2f      | 5.10E-27 | 0.7622539 | 0.303 | 0.073 | 8.32E-23 |
| Cnbp        | 5.96E-27 | 0.6843572 | 0.559 | 0.276 | 9.72E-23 |
| Hnrnpa2b1   | 6.24E-27 | 0.5265877 | 0.767 | 0.545 | 1.02E-22 |
| Cox6b1      | 7.11E-27 | 0.6249184 | 0.644 | 0.378 | 1.16E-22 |
| Reep5       | 1.66E-26 | 0.646168  | 0.527 | 0.242 | 2.71E-22 |
| Ndufa13     | 1.69E-26 | 0.6547293 | 0.626 | 0.361 | 2.75E-22 |
| Atp5f1      | 2.25E-26 | 0.6013101 | 0.568 | 0.288 | 3.67E-22 |
| Dusp2       | 2.53E-26 | 0.8744113 | 0.493 | 0.227 | 4.12E-22 |
| Ndufc1      | 5.32E-26 | 0.8240678 | 0.269 | 0.06  | 8.66E-22 |
| Snrpd3      | 6.49E-26 | 0.7582274 | 0.269 | 0.058 | 1.06E-21 |
| Snrpb       | 8.39E-26 | 0.6921292 | 0.443 | 0.184 | 1.37E-21 |
| Nme1        | 1.78E-25 | 0.7117558 | 0.286 | 0.069 | 2.90E-21 |
| Gpr84       | 1.93E-25 | 0.8972645 | 0.256 | 0.051 | 3.14E-21 |
| Nop10       | 2.04E-25 | 0.7260192 | 0.286 | 0.069 | 3.32E-21 |
| Cd81        | 2.32E-25 | 0.7992773 | 0.268 | 0.06  | 3.79E-21 |
| Pcbp2       | 3.50E-25 | 0.5717772 | 0.706 | 0.466 | 5.71E-21 |
| Ccng1       | 7.82E-25 | 0.8150644 | 0.274 | 0.064 | 1.27E-20 |
| Polr2k      | 1.33E-24 | 0.7434491 | 0.314 | 0.091 | 2.17E-20 |
| Cdkn1a      | 1.73E-24 | 0.788334  | 0.542 | 0.275 | 2.82E-20 |
| Atp5j       | 2.01E-24 | 0.6347213 | 0.545 | 0.287 | 3.27E-20 |
| Lsm6        | 2.39E-24 | 0.7317768 | 0.259 | 0.057 | 3.90E-20 |
| Cmtm7       | 2.64E-24 | 0.6715618 | 0.472 | 0.212 | 4.30E-20 |
| Tmem258     | 2.66E-24 | 0.6940728 | 0.39  | 0.148 | 4.33E-20 |
| Hnrnpab     | 3.05E-24 | 0.6740152 | 0.414 | 0.167 | 4.96E-20 |
| Nol7        | 3.61E-24 | 0.703646  | 0.283 | 0.072 | 5.89E-20 |
| Emc6        | 3.86E-24 | 0.6995638 | 0.269 | 0.063 | 6.30E-20 |

|         |          |           |       |       |          |
|---------|----------|-----------|-------|-------|----------|
| Hnrnpd  | 4.03E-24 | 0.6611769 | 0.414 | 0.163 | 6.56E-20 |
| Psmb6   | 4.49E-24 | 0.6653997 | 0.298 | 0.081 | 7.31E-20 |
| Clec4n  | 6.81E-24 | 0.6846588 | 0.61  | 0.336 | 1.11E-19 |
| Eif4g2  | 7.15E-24 | 0.5756704 | 0.696 | 0.487 | 1.16E-19 |
| Mrps14  | 7.69E-24 | 0.6590737 | 0.307 | 0.087 | 1.25E-19 |
| Plin2   | 8.14E-24 | 0.6908193 | 0.531 | 0.275 | 1.33E-19 |
| Srsf3   | 1.22E-23 | 0.6543298 | 0.525 | 0.269 | 1.98E-19 |
| Dynll1  | 2.45E-23 | 0.5199977 | 0.699 | 0.418 | 4.00E-19 |
| Dek     | 7.69E-23 | 0.6802285 | 0.32  | 0.101 | 1.25E-18 |
| Atp5k   | 7.98E-23 | 0.6587175 | 0.4   | 0.161 | 1.30E-18 |
| Frrs1   | 1.02E-22 | 0.7844784 | 0.251 | 0.058 | 1.66E-18 |
| Pfn1    | 1.63E-22 | 0.3231094 | 0.951 | 0.91  | 2.65E-18 |
| Hnrnpf  | 1.78E-22 | 0.5501074 | 0.685 | 0.472 | 2.90E-18 |
| Pdap1   | 1.93E-22 | 0.6192839 | 0.289 | 0.081 | 3.15E-18 |
| G3bp1   | 2.05E-22 | 0.7029816 | 0.297 | 0.087 | 3.34E-18 |
| Taf10   | 2.67E-22 | 0.6150799 | 0.411 | 0.164 | 4.34E-18 |
| Mrps24  | 3.09E-22 | 0.6679303 | 0.307 | 0.094 | 5.03E-18 |
| Anp32b  | 3.87E-22 | 0.634223  | 0.349 | 0.122 | 6.30E-18 |
| Ndufa2  | 4.50E-22 | 0.6133168 | 0.511 | 0.261 | 7.33E-18 |
| Creb5   | 4.53E-22 | 0.7104708 | 0.266 | 0.067 | 7.38E-18 |
| Jpt1    | 8.10E-22 | 0.6629531 | 0.412 | 0.179 | 1.32E-17 |
| Tmem14c | 8.23E-22 | 0.6730785 | 0.508 | 0.267 | 1.34E-17 |
| Rbm8a   | 1.50E-21 | 0.6310071 | 0.347 | 0.124 | 2.45E-17 |
| Pfdn6   | 1.51E-21 | 0.6537813 | 0.323 | 0.109 | 2.47E-17 |
| Tmco1   | 1.87E-21 | 0.6421762 | 0.269 | 0.072 | 3.05E-17 |
| Snrpd2  | 2.07E-21 | 0.6744916 | 0.262 | 0.069 | 3.38E-17 |
| Tgfbr1  | 2.30E-21 | 0.6965217 | 0.411 | 0.179 | 3.75E-17 |
| Pfdn2   | 2.84E-21 | 0.6541327 | 0.355 | 0.134 | 4.62E-17 |
| Bcl2a1d | 2.93E-21 | 0.7404601 | 0.435 | 0.201 | 4.77E-17 |
| Dad1    | 5.61E-21 | 0.6504637 | 0.321 | 0.109 | 9.14E-17 |
| Ndufb5  | 7.88E-21 | 0.6298476 | 0.277 | 0.082 | 1.28E-16 |
| Rbm25   | 8.14E-21 | 0.5570052 | 0.627 | 0.391 | 1.33E-16 |
| Ssb     | 1.35E-20 | 0.6280212 | 0.28  | 0.084 | 2.20E-16 |
| Atp5a1  | 1.75E-20 | 0.5728204 | 0.388 | 0.16  | 2.85E-16 |
| Prdx1   | 2.03E-20 | 0.7238147 | 0.344 | 0.134 | 3.31E-16 |
| Aprt    | 2.04E-20 | 0.6570494 | 0.332 | 0.121 | 3.32E-16 |
| N4bp2l2 | 2.35E-20 | 0.6936335 | 0.307 | 0.103 | 3.84E-16 |
| Dbi     | 3.02E-20 | 0.6510265 | 0.259 | 0.073 | 4.93E-16 |
| Tnfaip3 | 5.62E-20 | 0.5421629 | 0.609 | 0.367 | 9.16E-16 |
| Hspa8   | 7.88E-20 | 0.4866978 | 0.795 | 0.645 | 1.28E-15 |
| Cox6c   | 1.42E-19 | 0.6485842 | 0.539 | 0.33  | 2.32E-15 |
| Tmed9   | 1.63E-19 | 0.5778493 | 0.303 | 0.1   | 2.65E-15 |
| Sod1    | 1.65E-19 | 0.6192698 | 0.368 | 0.149 | 2.69E-15 |

|             |          |           |       |       |          |
|-------------|----------|-----------|-------|-------|----------|
| St13        | 1.72E-19 | 0.5814973 | 0.353 | 0.137 | 2.81E-15 |
| Gng5        | 1.74E-19 | 0.3735799 | 0.875 | 0.784 | 2.84E-15 |
| Atp5j2      | 2.32E-19 | 0.6187287 | 0.504 | 0.276 | 3.77E-15 |
| Zranb2      | 2.65E-19 | 0.6414368 | 0.283 | 0.094 | 4.32E-15 |
| Atp5h       | 2.70E-19 | 0.5712407 | 0.542 | 0.325 | 4.41E-15 |
| Bola2       | 3.07E-19 | 0.603289  | 0.266 | 0.081 | 5.00E-15 |
| Pcbp1       | 4.08E-19 | 0.5606253 | 0.475 | 0.237 | 6.65E-15 |
| 1110008P14F | 8.10E-19 | 0.6096763 | 0.314 | 0.116 | 1.32E-14 |
| Klf2        | 8.50E-19 | 0.6816928 | 0.636 | 0.434 | 1.38E-14 |
| Atp5e       | 9.90E-19 | 0.4983325 | 0.743 | 0.587 | 1.61E-14 |
| B230219D22I | 1.18E-18 | 0.6298736 | 0.262 | 0.082 | 1.92E-14 |
| Tomm20      | 1.19E-18 | 0.5982344 | 0.361 | 0.149 | 1.94E-14 |
| Psm3        | 1.54E-18 | 0.5929851 | 0.406 | 0.184 | 2.50E-14 |
| Cox8a       | 1.57E-18 | 0.4032426 | 0.855 | 0.724 | 2.56E-14 |
| Tomm7       | 4.03E-18 | 0.5360274 | 0.551 | 0.337 | 6.57E-14 |
| Thrap3      | 5.87E-18 | 0.5819918 | 0.268 | 0.087 | 9.56E-14 |
| Bcl2a1a     | 6.89E-18 | 0.6598649 | 0.373 | 0.163 | 1.12E-13 |
| Btf3        | 8.92E-18 | 0.5237064 | 0.589 | 0.379 | 1.45E-13 |
| Ndufb4      | 9.57E-18 | 0.5772331 | 0.295 | 0.107 | 1.56E-13 |
| Lamtor2     | 9.99E-18 | 0.5746754 | 0.409 | 0.196 | 1.63E-13 |
| Luc7l3      | 1.14E-17 | 0.6180097 | 0.297 | 0.109 | 1.85E-13 |
| Mrps33      | 1.65E-17 | 0.5925532 | 0.309 | 0.118 | 2.69E-13 |
| Capg        | 1.67E-17 | 0.6781119 | 0.314 | 0.127 | 2.72E-13 |
| Alyref      | 1.83E-17 | 0.5827205 | 0.251 | 0.079 | 2.97E-13 |
| Sqstm1      | 2.21E-17 | 0.5614303 | 0.542 | 0.316 | 3.61E-13 |
| Cep83       | 2.24E-17 | 0.692379  | 0.3   | 0.116 | 3.65E-13 |
| Ndufs7      | 2.52E-17 | 0.6039462 | 0.324 | 0.133 | 4.11E-13 |
| Rack1       | 2.80E-17 | 0.484961  | 0.536 | 0.304 | 4.56E-13 |
| Eif3c       | 4.57E-17 | 0.5842056 | 0.285 | 0.104 | 7.45E-13 |
| Trmt112     | 4.92E-17 | 0.576278  | 0.275 | 0.097 | 8.02E-13 |
| Romo1       | 5.13E-17 | 0.5599691 | 0.26  | 0.084 | 8.35E-13 |
| Cox5a       | 6.85E-17 | 0.5583781 | 0.425 | 0.215 | 1.12E-12 |
| Arpc1b      | 7.46E-17 | 0.3267717 | 0.892 | 0.806 | 1.22E-12 |
| Mdm2        | 7.53E-17 | 0.7862307 | 0.373 | 0.178 | 1.23E-12 |
| Fam49b      | 8.83E-17 | 0.4073376 | 0.756 | 0.601 | 1.44E-12 |
| Skil        | 1.13E-16 | 0.3793065 | 0.773 | 0.597 | 1.83E-12 |
| Map4k4      | 1.28E-16 | 0.6879224 | 0.367 | 0.179 | 2.08E-12 |
| Papola      | 1.31E-16 | 0.5506514 | 0.358 | 0.158 | 2.14E-12 |
| Bax         | 1.40E-16 | 0.5669992 | 0.269 | 0.094 | 2.29E-12 |
| Atf4        | 1.51E-16 | 0.4837681 | 0.592 | 0.388 | 2.46E-12 |
| H2afz       | 1.59E-16 | 0.4688085 | 0.647 | 0.446 | 2.60E-12 |
| Usmg5       | 1.68E-16 | 0.4884306 | 0.487 | 0.275 | 2.73E-12 |
| H2afy       | 1.73E-16 | 0.5933137 | 0.336 | 0.145 | 2.82E-12 |

|         |          |           |       |       |          |
|---------|----------|-----------|-------|-------|----------|
| Atp5c1  | 1.89E-16 | 0.5749256 | 0.39  | 0.191 | 3.08E-12 |
| Llph    | 2.18E-16 | 0.5874455 | 0.304 | 0.118 | 3.56E-12 |
| Ndufb3  | 2.44E-16 | 0.6189367 | 0.317 | 0.131 | 3.98E-12 |
| Znrd1   | 3.68E-16 | 0.5288679 | 0.262 | 0.091 | 5.99E-12 |
| Hmgb1   | 4.80E-16 | 0.4833904 | 0.534 | 0.322 | 7.83E-12 |
| Cd24a   | 6.86E-16 | 0.4121501 | 0.735 | 0.563 | 1.12E-11 |
| Tardbp  | 7.28E-16 | 0.5351123 | 0.253 | 0.087 | 1.19E-11 |
| Ndufs5  | 7.64E-16 | 0.5627524 | 0.346 | 0.155 | 1.25E-11 |
| Gm26532 | 8.44E-16 | 0.6104145 | 0.574 | 0.381 | 1.37E-11 |
| Spcs1   | 1.55E-15 | 0.5156548 | 0.259 | 0.091 | 2.53E-11 |
| Ube3a   | 1.65E-15 | 0.6099877 | 0.268 | 0.101 | 2.68E-11 |
| Csde1   | 1.74E-15 | 0.4555576 | 0.577 | 0.369 | 2.84E-11 |
| Ncl     | 1.79E-15 | 0.4780625 | 0.525 | 0.307 | 2.91E-11 |
| Mob1a   | 1.88E-15 | 0.4348247 | 0.592 | 0.385 | 3.07E-11 |
| Canx    | 2.18E-15 | 0.5203003 | 0.286 | 0.11  | 3.55E-11 |
| Cox5b   | 3.20E-15 | 0.5011195 | 0.514 | 0.312 | 5.21E-11 |
| Ndufa8  | 3.35E-15 | 0.5501908 | 0.285 | 0.112 | 5.46E-11 |
| Vdac2   | 3.81E-15 | 0.504192  | 0.414 | 0.216 | 6.22E-11 |
| Hnrnph1 | 5.63E-15 | 0.4813957 | 0.422 | 0.219 | 9.17E-11 |
| Irf2bp2 | 6.48E-15 | 0.488326  | 0.498 | 0.282 | 1.06E-10 |
| Srp14   | 6.62E-15 | 0.4988737 | 0.449 | 0.258 | 1.08E-10 |
| Son     | 7.12E-15 | 0.3597117 | 0.782 | 0.636 | 1.16E-10 |
| Eif3a   | 7.77E-15 | 0.5554217 | 0.42  | 0.225 | 1.27E-10 |
| Polr1d  | 8.00E-15 | 0.51688   | 0.33  | 0.148 | 1.30E-10 |
| Psmb5   | 8.82E-15 | 0.5555385 | 0.336 | 0.161 | 1.44E-10 |
| Mbnl1   | 1.00E-14 | 0.5696748 | 0.447 | 0.257 | 1.63E-10 |
| Ndufb8  | 1.08E-14 | 0.576075  | 0.274 | 0.107 | 1.75E-10 |
| Zfp710  | 1.37E-14 | 0.5562832 | 0.279 | 0.113 | 2.23E-10 |
| Ndufs6  | 1.97E-14 | 0.5038604 | 0.301 | 0.131 | 3.21E-10 |
| Ndufb9  | 2.33E-14 | 0.4922277 | 0.492 | 0.307 | 3.80E-10 |
| Tmed2   | 2.36E-14 | 0.4927059 | 0.438 | 0.242 | 3.84E-10 |
| Eif5b   | 2.65E-14 | 0.5495266 | 0.271 | 0.109 | 4.32E-10 |
| Mrpl57  | 2.93E-14 | 0.4966475 | 0.262 | 0.097 | 4.77E-10 |
| Uqcr11  | 3.04E-14 | 0.5742784 | 0.365 | 0.185 | 4.95E-10 |
| U2af1   | 3.08E-14 | 0.525295  | 0.282 | 0.115 | 5.02E-10 |
| Sf3b5   | 4.26E-14 | 0.497638  | 0.39  | 0.203 | 6.95E-10 |
| Cox4i1  | 5.49E-14 | 0.3749278 | 0.738 | 0.607 | 8.95E-10 |
| Ndufa6  | 6.91E-14 | 0.501428  | 0.33  | 0.154 | 1.13E-09 |
| Sec61g  | 7.40E-14 | 0.4472663 | 0.393 | 0.203 | 1.21E-09 |
| Uqcr10  | 1.13E-13 | 0.5220696 | 0.419 | 0.237 | 1.83E-09 |
| Dhx15   | 1.13E-13 | 0.5354731 | 0.259 | 0.103 | 1.85E-09 |
| Rer1    | 1.25E-13 | 0.543054  | 0.347 | 0.173 | 2.03E-09 |
| Nedd8   | 1.51E-13 | 0.4759599 | 0.501 | 0.325 | 2.47E-09 |

|             |          |           |       |       |          |
|-------------|----------|-----------|-------|-------|----------|
| Ptp4a2      | 1.55E-13 | 0.4886005 | 0.438 | 0.245 | 2.53E-09 |
| Ost4        | 1.92E-13 | 0.4445387 | 0.53  | 0.337 | 3.12E-09 |
| Dnaja1      | 2.37E-13 | 0.43257   | 0.679 | 0.515 | 3.86E-09 |
| Sf3b6       | 2.52E-13 | 0.4435898 | 0.447 | 0.263 | 4.10E-09 |
| Phlda1      | 3.16E-13 | 0.5733049 | 0.304 | 0.14  | 5.14E-09 |
| Selenof     | 3.22E-13 | 0.5153096 | 0.312 | 0.146 | 5.24E-09 |
| Jund        | 3.23E-13 | 0.4007163 | 0.813 | 0.722 | 5.26E-09 |
| Ywhae       | 3.38E-13 | 0.4952116 | 0.356 | 0.182 | 5.51E-09 |
| Eif3j1      | 3.85E-13 | 0.4983773 | 0.309 | 0.145 | 6.28E-09 |
| M6pr        | 4.94E-13 | 0.4570324 | 0.289 | 0.125 | 8.05E-09 |
| Ppig        | 5.05E-13 | 0.520131  | 0.314 | 0.148 | 8.24E-09 |
| Ndufb7      | 5.21E-13 | 0.4978511 | 0.423 | 0.242 | 8.49E-09 |
| Dynlrb1     | 7.01E-13 | 0.5347459 | 0.303 | 0.14  | 1.14E-08 |
| Plekho2     | 7.69E-13 | 0.385019  | 0.556 | 0.352 | 1.25E-08 |
| Tra2b       | 8.03E-13 | 0.4395474 | 0.399 | 0.213 | 1.31E-08 |
| Kif5b       | 8.17E-13 | 0.4044744 | 0.466 | 0.276 | 1.33E-08 |
| Ndufa3      | 8.55E-13 | 0.4807761 | 0.443 | 0.257 | 1.39E-08 |
| Mdh2        | 1.08E-12 | 0.4468045 | 0.473 | 0.297 | 1.76E-08 |
| Mien1       | 1.29E-12 | 0.4538651 | 0.271 | 0.118 | 2.11E-08 |
| Ndufa1      | 1.57E-12 | 0.5002983 | 0.346 | 0.181 | 2.55E-08 |
| Hnrnpu      | 1.83E-12 | 0.4436281 | 0.603 | 0.442 | 2.99E-08 |
| Psme2       | 1.87E-12 | 0.48667   | 0.297 | 0.14  | 3.05E-08 |
| Spcs2       | 2.13E-12 | 0.5007659 | 0.3   | 0.142 | 3.47E-08 |
| Jun         | 2.20E-12 | 0.6819352 | 0.47  | 0.291 | 3.58E-08 |
| Itch        | 2.36E-12 | 0.5942352 | 0.297 | 0.148 | 3.85E-08 |
| Cited2      | 2.40E-12 | 0.4977048 | 0.39  | 0.213 | 3.91E-08 |
| Pabpc1      | 2.45E-12 | 0.4381044 | 0.642 | 0.506 | 4.00E-08 |
| Fam105a     | 2.94E-12 | 0.5188873 | 0.292 | 0.136 | 4.79E-08 |
| Tmem167     | 3.06E-12 | 0.4917514 | 0.307 | 0.148 | 4.99E-08 |
| Hsp90b1     | 3.64E-12 | 0.441682  | 0.307 | 0.146 | 5.92E-08 |
| Mrfap1      | 4.21E-12 | 0.4355836 | 0.37  | 0.197 | 6.86E-08 |
| Arglu1      | 4.23E-12 | 0.5214861 | 0.251 | 0.106 | 6.90E-08 |
| Mpc2        | 4.36E-12 | 0.4430532 | 0.361 | 0.193 | 7.11E-08 |
| Abracl      | 4.99E-12 | 0.4587052 | 0.449 | 0.266 | 8.13E-08 |
| Eef1d       | 5.31E-12 | 0.4975727 | 0.253 | 0.107 | 8.65E-08 |
| Tma7        | 5.96E-12 | 0.4321081 | 0.492 | 0.306 | 9.71E-08 |
| Eloc        | 1.03E-11 | 0.4258893 | 0.402 | 0.228 | 1.68E-07 |
| Ptk2b       | 1.05E-11 | 0.4506495 | 0.42  | 0.246 | 1.71E-07 |
| Rbm3        | 1.14E-11 | 0.3964795 | 0.463 | 0.281 | 1.86E-07 |
| Bag1        | 1.17E-11 | 0.4344194 | 0.285 | 0.133 | 1.91E-07 |
| Ube2i       | 1.53E-11 | 0.4188482 | 0.431 | 0.257 | 2.50E-07 |
| Hnrnpa0     | 1.55E-11 | 0.4424107 | 0.381 | 0.209 | 2.52E-07 |
| 1810037117R | 1.76E-11 | 0.417554  | 0.42  | 0.245 | 2.87E-07 |

|         |          |           |       |       |          |
|---------|----------|-----------|-------|-------|----------|
| Jak2    | 1.96E-11 | 0.4887977 | 0.367 | 0.204 | 3.20E-07 |
| Tpm3    | 1.97E-11 | 0.3600304 | 0.641 | 0.472 | 3.21E-07 |
| Srsf2   | 2.10E-11 | 0.4649779 | 0.365 | 0.201 | 3.42E-07 |
| Ndufa7  | 2.20E-11 | 0.4167394 | 0.545 | 0.367 | 3.58E-07 |
| Pnlsr   | 2.42E-11 | 0.4538674 | 0.422 | 0.251 | 3.95E-07 |
| Cnih4   | 3.18E-11 | 0.436948  | 0.385 | 0.221 | 5.18E-07 |
| Tpr     | 3.78E-11 | 0.4616026 | 0.402 | 0.228 | 6.16E-07 |
| Snrnp70 | 3.99E-11 | 0.4493626 | 0.306 | 0.154 | 6.50E-07 |
| Kdm5a   | 4.34E-11 | 0.4922809 | 0.251 | 0.115 | 7.07E-07 |
| Celf1   | 4.73E-11 | 0.4809927 | 0.288 | 0.142 | 7.71E-07 |
| Gcnt1   | 5.14E-11 | 0.3537858 | 0.419 | 0.245 | 8.37E-07 |
| Psmb1   | 5.77E-11 | 0.4540741 | 0.295 | 0.151 | 9.41E-07 |
| Eif3h   | 6.30E-11 | 0.4686864 | 0.292 | 0.148 | 1.03E-06 |
| Brd2    | 6.76E-11 | 0.4224916 | 0.518 | 0.349 | 1.10E-06 |
| Rhoa    | 6.89E-11 | 0.3190284 | 0.788 | 0.673 | 1.12E-06 |
| Eif2s2  | 8.57E-11 | 0.5271223 | 0.314 | 0.169 | 1.40E-06 |
| Prpf40a | 8.77E-11 | 0.3898384 | 0.371 | 0.204 | 1.43E-06 |
| Atp5l   | 9.33E-11 | 0.3450808 | 0.766 | 0.657 | 1.52E-06 |
| Atp6v1f | 9.55E-11 | 0.3865171 | 0.514 | 0.351 | 1.56E-06 |
| Ptges3  | 1.25E-10 | 0.4669534 | 0.326 | 0.182 | 2.03E-06 |
| Magoh   | 1.51E-10 | 0.4041785 | 0.335 | 0.176 | 2.45E-06 |
| Eif1b   | 1.70E-10 | 0.4895984 | 0.269 | 0.133 | 2.77E-06 |
| Cks2    | 2.53E-10 | 0.5123122 | 0.396 | 0.239 | 4.12E-06 |
| Ywhab   | 2.57E-10 | 0.430967  | 0.346 | 0.194 | 4.18E-06 |
| Srp9    | 2.89E-10 | 0.4319493 | 0.411 | 0.252 | 4.71E-06 |
| Hnrnpk  | 3.79E-10 | 0.3729477 | 0.534 | 0.364 | 6.17E-06 |
| Smdt1   | 4.13E-10 | 0.4344052 | 0.368 | 0.213 | 6.73E-06 |
| Snx3    | 4.23E-10 | 0.3769796 | 0.362 | 0.21  | 6.89E-06 |
| Psma2   | 4.48E-10 | 0.4354737 | 0.32  | 0.176 | 7.30E-06 |
| Zmiz1   | 5.65E-10 | 0.4497802 | 0.356 | 0.203 | 9.21E-06 |
| Asah1   | 6.32E-10 | 0.4379448 | 0.288 | 0.148 | 1.03E-05 |
| Psma7   | 7.06E-10 | 0.4159968 | 0.373 | 0.218 | 1.15E-05 |
| Ssr4    | 8.69E-10 | 0.471641  | 0.311 | 0.17  | 1.42E-05 |
| Gnb1    | 8.76E-10 | 0.4185653 | 0.414 | 0.269 | 1.43E-05 |
| Srsf6   | 9.00E-10 | 0.4089482 | 0.263 | 0.13  | 1.47E-05 |
| Cflar   | 9.27E-10 | 0.5059188 | 0.336 | 0.194 | 1.51E-05 |
| Pbrm1   | 1.15E-09 | 0.4218137 | 0.298 | 0.158 | 1.88E-05 |
| Mif     | 1.19E-09 | 0.3921942 | 0.387 | 0.231 | 1.94E-05 |
| Cdk12   | 1.20E-09 | 0.4473849 | 0.265 | 0.133 | 1.96E-05 |
| Snrpc   | 1.30E-09 | 0.459193  | 0.272 | 0.142 | 2.12E-05 |
| Ergic2  | 1.31E-09 | 0.3796106 | 0.285 | 0.146 | 2.14E-05 |
| Slbp    | 1.35E-09 | 0.4796342 | 0.263 | 0.134 | 2.20E-05 |
| Ubl5    | 1.41E-09 | 0.3492001 | 0.654 | 0.531 | 2.29E-05 |

|        |          |           |       |       |          |
|--------|----------|-----------|-------|-------|----------|
| Ubxn1  | 1.45E-09 | 0.4025232 | 0.347 | 0.203 | 2.36E-05 |
| Prrc2c | 1.49E-09 | 0.3569657 | 0.534 | 0.372 | 2.43E-05 |
| Mrps21 | 1.65E-09 | 0.4256752 | 0.304 | 0.169 | 2.69E-05 |
| Atox1  | 2.21E-09 | 0.2874294 | 0.67  | 0.512 | 3.60E-05 |
| Mapre1 | 2.82E-09 | 0.4165003 | 0.37  | 0.221 | 4.59E-05 |
| Gtf2h5 | 3.14E-09 | 0.4308574 | 0.259 | 0.131 | 5.11E-05 |
| Ccr12  | 3.19E-09 | 0.30241   | 0.651 | 0.476 | 5.20E-05 |
| Ptpn6  | 3.75E-09 | 0.3310579 | 0.521 | 0.349 | 6.11E-05 |
| Psma1  | 3.84E-09 | 0.411253  | 0.292 | 0.157 | 6.26E-05 |
| Atpif1 | 4.55E-09 | 0.4455421 | 0.263 | 0.136 | 7.41E-05 |
| Ski    | 5.01E-09 | 0.3920643 | 0.381 | 0.23  | 8.16E-05 |
| Mef2a  | 5.11E-09 | 0.350505  | 0.499 | 0.351 | 8.33E-05 |
| Alas1  | 5.27E-09 | 0.4434594 | 0.349 | 0.209 | 8.58E-05 |
| Atp5d  | 5.36E-09 | 0.3721417 | 0.3   | 0.163 | 8.73E-05 |
| Pum2   | 6.06E-09 | 0.3369142 | 0.556 | 0.39  | 9.88E-05 |

|         | SigF LO   |           |       |       |           |
|---------|-----------|-----------|-------|-------|-----------|
|         | p_val     | avg_logFC | pct.1 | pct.2 | p_val_adj |
| Slpi    | 1.68E-127 | 2.3466051 | 0.773 | 0.148 | 2.73E-123 |
| Retnlg  | 9.49E-122 | 3.3717243 | 0.669 | 0.053 | 1.55E-117 |
| Grina   | 3.43E-113 | 1.3934153 | 0.884 | 0.405 | 5.59E-109 |
| S100a11 | 9.76E-108 | 0.9349794 | 0.982 | 0.912 | 1.59E-103 |
| Ccl6    | 5.04E-104 | 1.9476021 | 0.74  | 0.212 | 8.21E-100 |
| Sell    | 5.93E-94  | 1.73433   | 0.606 | 0.076 | 9.66E-90  |
| Msrb1   | 2.61E-92  | 0.9591929 | 0.961 | 0.721 | 4.25E-88  |
| Srgn    | 2.23E-81  | 0.6488181 | 0.996 | 0.974 | 3.64E-77  |
| Slc7a11 | 4.22E-78  | 1.0459054 | 0.915 | 0.572 | 6.88E-74  |
| Hdc     | 1.45E-77  | 1.2217219 | 0.791 | 0.367 | 2.37E-73  |
| Taldo1  | 3.35E-73  | 1.0571176 | 0.818 | 0.521 | 5.45E-69  |
| Clec4d  | 3.39E-70  | 0.836707  | 0.949 | 0.761 | 5.53E-66  |
| Actg1   | 7.17E-70  | 0.7487872 | 0.981 | 0.915 | 1.17E-65  |
| Vps37b  | 9.45E-70  | 1.5522767 | 0.599 | 0.163 | 1.54E-65  |
| Gda     | 4.56E-69  | 1.5041355 | 0.599 | 0.163 | 7.44E-65  |
| Mxd1    | 1.20E-67  | 0.9079721 | 0.928 | 0.607 | 1.96E-63  |
| S100a6  | 3.99E-67  | 1.1025988 | 0.912 | 0.633 | 6.50E-63  |
| Entpd1  | 1.57E-60  | 1.1441479 | 0.654 | 0.237 | 2.56E-56  |
| Adam8   | 4.81E-60  | 1.2644197 | 0.521 | 0.119 | 7.83E-56  |
| Ifitm2  | 6.68E-60  | 0.9092764 | 0.909 | 0.683 | 1.09E-55  |
| Slc16a3 | 2.68E-59  | 1.0875602 | 0.7   | 0.297 | 4.36E-55  |
| H2-D1   | 2.04E-57  | 0.6715068 | 0.927 | 0.776 | 3.32E-53  |
| Hp      | 6.46E-56  | 1.1306351 | 0.646 | 0.253 | 1.05E-51  |
| Jaml    | 4.30E-55  | 1.2940452 | 0.433 | 0.064 | 7.01E-51  |
| S100a9  | 3.22E-53  | 0.954252  | 0.946 | 0.799 | 5.25E-49  |
| Fgl2    | 1.67E-51  | 1.0048561 | 0.679 | 0.304 | 2.73E-47  |
| S100a8  | 7.57E-49  | 0.7638233 | 0.969 | 0.811 | 1.23E-44  |
| Lmnb1   | 2.23E-47  | 0.7367647 | 0.864 | 0.616 | 3.64E-43  |
| Acod1   | 8.69E-45  | 1.0843033 | 0.663 | 0.303 | 1.42E-40  |
| Asprv1  | 4.56E-44  | 1.5641525 | 0.342 | 0.041 | 7.44E-40  |
| Slc15a3 | 1.74E-43  | 0.9576972 | 0.519 | 0.177 | 2.84E-39  |
| Mcomp1  | 3.92E-43  | 0.9403597 | 0.554 | 0.21  | 6.39E-39  |
| Ndel1   | 1.26E-42  | 0.8185335 | 0.751 | 0.478 | 2.05E-38  |
| Selplg  | 1.27E-42  | 0.820086  | 0.701 | 0.394 | 2.06E-38  |
| Btg1    | 3.52E-42  | 0.5232237 | 0.985 | 0.91  | 5.74E-38  |
| Trim30b | 1.87E-41  | 1.0027372 | 0.479 | 0.149 | 3.04E-37  |
| Txn1    | 2.24E-39  | 0.6803222 | 0.881 | 0.737 | 3.64E-35  |
| Cebpb   | 1.75E-38  | 0.4506408 | 0.988 | 0.959 | 2.85E-34  |
| Sh2d3c  | 2.27E-38  | 1.0817048 | 0.357 | 0.068 | 3.70E-34  |
| Sifn4   | 7.80E-38  | 1.4833033 | 0.44  | 0.14  | 1.27E-33  |
| Tpd52   | 1.69E-37  | 0.6371773 | 0.872 | 0.699 | 2.76E-33  |

|            |          |           |       |       |          |
|------------|----------|-----------|-------|-------|----------|
| AC110211.1 | 1.94E-37 | 0.9951893 | 0.376 | 0.088 | 3.16E-33 |
| Ncf2       | 2.59E-37 | 0.7617167 | 0.712 | 0.432 | 4.22E-33 |
| Csf3r      | 2.90E-37 | 0.4916786 | 0.952 | 0.846 | 4.73E-33 |
| Selenon    | 2.60E-36 | 0.944471  | 0.393 | 0.102 | 4.24E-32 |
| Impact     | 5.85E-35 | 1.0220645 | 0.312 | 0.052 | 9.53E-31 |
| Lrg1       | 4.73E-34 | 1.1904111 | 0.346 | 0.079 | 7.71E-30 |
| Ankrd33b   | 5.53E-34 | 0.8746349 | 0.515 | 0.216 | 9.01E-30 |
| Neat1      | 1.77E-33 | 0.4786035 | 0.97  | 0.918 | 2.88E-29 |
| Ifitm3     | 7.91E-33 | 1.0142363 | 0.661 | 0.384 | 1.29E-28 |
| Itgal      | 1.02E-32 | 0.8664089 | 0.509 | 0.224 | 1.67E-28 |
| Isg15      | 4.89E-32 | 1.417037  | 0.285 | 0.047 | 7.96E-28 |
| Cd300ld    | 5.21E-32 | 0.6859663 | 0.716 | 0.473 | 8.49E-28 |
| Rdh12      | 1.17E-31 | 1.0686621 | 0.261 | 0.033 | 1.90E-27 |
| Litaf      | 2.07E-31 | 0.5474352 | 0.861 | 0.658 | 3.37E-27 |
| Rnf149     | 2.47E-31 | 0.6843906 | 0.819 | 0.659 | 4.02E-27 |
| Slc40a1    | 4.08E-31 | 1.0336384 | 0.318 | 0.07  | 6.66E-27 |
| Pla2g7     | 9.84E-31 | 0.7191066 | 0.63  | 0.341 | 1.60E-26 |
| Rassf3     | 1.35E-30 | 0.803644  | 0.422 | 0.152 | 2.19E-26 |
| Samhd1     | 1.38E-30 | 0.7687372 | 0.654 | 0.399 | 2.25E-26 |
| Rnf144a    | 5.66E-30 | 0.8719941 | 0.272 | 0.046 | 9.22E-26 |
| Coq10b     | 6.89E-30 | 0.7247156 | 0.567 | 0.288 | 1.12E-25 |
| Fyb        | 7.83E-30 | 0.6697375 | 0.575 | 0.286 | 1.28E-25 |
| Cd9        | 7.37E-29 | 0.5388245 | 0.851 | 0.648 | 1.20E-24 |
| H2-Q10     | 2.17E-28 | 0.7850576 | 0.427 | 0.158 | 3.54E-24 |
| Slc2a3     | 3.67E-28 | 1.0197895 | 0.399 | 0.14  | 5.98E-24 |
| Osm        | 5.30E-28 | 1.0502603 | 0.327 | 0.09  | 8.63E-24 |
| Fam129a    | 3.78E-27 | 0.810462  | 0.36  | 0.117 | 6.16E-23 |
| Smox       | 9.37E-27 | 0.8696013 | 0.34  | 0.107 | 1.53E-22 |
| Cd33       | 1.92E-26 | 0.6233785 | 0.684 | 0.419 | 3.14E-22 |
| Il1f9      | 4.12E-26 | 0.8186647 | 0.315 | 0.082 | 6.72E-22 |
| Sorl1      | 1.00E-25 | 0.5557555 | 0.76  | 0.528 | 1.63E-21 |
| Ftl1       | 3.48E-25 | 0.3875596 | 0.997 | 0.991 | 5.67E-21 |
| Rab7       | 3.82E-25 | 0.7085998 | 0.758 | 0.601 | 6.23E-21 |
| Prr13      | 4.42E-25 | 0.7299998 | 0.504 | 0.266 | 7.21E-21 |
| Fosl2      | 7.58E-25 | 0.5300914 | 0.761 | 0.537 | 1.23E-20 |
| Dusp1      | 9.01E-25 | 0.422393  | 0.922 | 0.781 | 1.47E-20 |
| Hcar2      | 1.29E-24 | 0.5911269 | 0.634 | 0.355 | 2.10E-20 |
| Lamp2      | 2.40E-24 | 0.7529612 | 0.603 | 0.37  | 3.91E-20 |
| Ets2       | 6.44E-24 | 0.4816519 | 0.87  | 0.703 | 1.05E-19 |
| Wfdc21     | 8.52E-24 | 0.9148799 | 0.322 | 0.1   | 1.39E-19 |
| Map1lc3b   | 9.02E-24 | 0.5103827 | 0.776 | 0.6   | 1.47E-19 |
| Plk3       | 2.18E-23 | 0.7289722 | 0.473 | 0.225 | 3.55E-19 |
| Tpm4       | 6.16E-23 | 0.699939  | 0.436 | 0.196 | 1.00E-18 |

|         |          |           |       |       |          |
|---------|----------|-----------|-------|-------|----------|
| Sat1    | 6.55E-23 | 0.5991152 | 0.697 | 0.499 | 1.07E-18 |
| Mrpl33  | 9.06E-23 | 0.6109526 | 0.649 | 0.44  | 1.48E-18 |
| Pnrc1   | 9.13E-23 | 0.4711381 | 0.86  | 0.697 | 1.49E-18 |
| Braf    | 1.23E-22 | 0.7193706 | 0.407 | 0.172 | 2.00E-18 |
| Gadd45a | 2.47E-22 | 0.8279753 | 0.369 | 0.146 | 4.02E-18 |
| Btg2    | 2.51E-22 | 0.398657  | 0.954 | 0.865 | 4.09E-18 |
| Stfa2l1 | 3.45E-22 | 1.0756667 | 0.39  | 0.163 | 5.62E-18 |
| Gla     | 7.44E-22 | 0.763974  | 0.337 | 0.122 | 1.21E-17 |
| Kpna4   | 2.08E-21 | 0.6205195 | 0.581 | 0.362 | 3.38E-17 |
| Lilr4b  | 5.88E-21 | 0.6001344 | 0.694 | 0.508 | 9.58E-17 |
| Wfdc17  | 6.81E-21 | 1.0600872 | 0.355 | 0.146 | 1.11E-16 |
| Klf3    | 6.93E-21 | 0.6583864 | 0.501 | 0.274 | 1.13E-16 |
| Il1b    | 8.61E-21 | 0.3868369 | 0.993 | 0.971 | 1.40E-16 |
| Thbs1   | 1.64E-20 | 1.2312609 | 0.479 | 0.275 | 2.67E-16 |
| Gsr     | 1.86E-20 | 0.4128982 | 0.833 | 0.63  | 3.04E-16 |
| Csrnp1  | 2.68E-20 | 0.6213042 | 0.634 | 0.42  | 4.37E-16 |
| Hmox1   | 3.78E-20 | 0.8622359 | 0.425 | 0.212 | 6.17E-16 |
| Rilpl2  | 4.56E-20 | 0.8145225 | 0.252 | 0.07  | 7.43E-16 |
| Dhrs9   | 1.74E-19 | 0.7266821 | 0.297 | 0.105 | 2.84E-15 |
| Por     | 1.83E-19 | 0.6653094 | 0.34  | 0.139 | 2.99E-15 |
| Tlr2    | 1.22E-18 | 0.8003485 | 0.33  | 0.135 | 1.98E-14 |
| Tgm2    | 1.38E-18 | 0.6793521 | 0.519 | 0.314 | 2.24E-14 |
| Ifitm1  | 1.39E-18 | 0.7282181 | 0.6   | 0.39  | 2.27E-14 |
| Cd84    | 1.91E-18 | 0.6348728 | 0.321 | 0.123 | 3.11E-14 |
| Cxcr2   | 2.32E-18 | 0.4637112 | 0.779 | 0.616 | 3.77E-14 |
| Arg2    | 2.98E-18 | 0.5502656 | 0.484 | 0.269 | 4.86E-14 |
| Trem3   | 3.13E-18 | 0.6325835 | 0.39  | 0.189 | 5.10E-14 |
| Fcgr4   | 3.22E-18 | 0.6560773 | 0.266 | 0.085 | 5.25E-14 |
| Ccr1    | 4.94E-18 | 0.41741   | 0.873 | 0.734 | 8.05E-14 |
| Kctd12  | 5.30E-18 | 0.5010671 | 0.77  | 0.589 | 8.63E-14 |
| Sgms2   | 5.51E-18 | 0.7402777 | 0.269 | 0.091 | 8.98E-14 |
| Gpcpd1  | 7.08E-18 | 0.671419  | 0.484 | 0.277 | 1.15E-13 |
| Notch2  | 8.46E-18 | 0.6357672 | 0.325 | 0.131 | 1.38E-13 |
| Emilin2 | 1.54E-17 | 0.5583533 | 0.542 | 0.339 | 2.51E-13 |
| Sephs2  | 1.83E-17 | 0.6846986 | 0.275 | 0.1   | 2.98E-13 |
| Hcst    | 2.17E-17 | 0.5535448 | 0.439 | 0.23  | 3.54E-13 |
| Zyx     | 2.52E-17 | 0.5555954 | 0.634 | 0.464 | 4.11E-13 |
| Lcn2    | 4.78E-17 | 0.9891395 | 0.322 | 0.14  | 7.79E-13 |
| Ripor2  | 5.92E-17 | 0.6770042 | 0.272 | 0.099 | 9.65E-13 |
| Homer1  | 6.02E-17 | 0.6697555 | 0.339 | 0.152 | 9.80E-13 |
| Cd300lf | 7.63E-17 | 0.480074  | 0.682 | 0.505 | 1.24E-12 |
| Pglyrp1 | 7.93E-17 | 0.5745206 | 0.587 | 0.402 | 1.29E-12 |
| Oasl2   | 1.82E-16 | 0.8172493 | 0.306 | 0.129 | 2.96E-12 |

|          |          |           |       |       |          |
|----------|----------|-----------|-------|-------|----------|
| Ell2     | 1.93E-16 | 0.5639098 | 0.473 | 0.269 | 3.14E-12 |
| Tspan13  | 1.98E-16 | 0.6196403 | 0.387 | 0.195 | 3.23E-12 |
| Trim30a  | 2.87E-16 | 0.6761583 | 0.373 | 0.181 | 4.69E-12 |
| Cnn2     | 6.11E-16 | 0.5506251 | 0.34  | 0.158 | 9.96E-12 |
| Smchd1   | 6.53E-16 | 0.7553573 | 0.416 | 0.227 | 1.06E-11 |
| Trim12c  | 7.28E-16 | 0.6517898 | 0.315 | 0.137 | 1.19E-11 |
| AB124611 | 1.47E-15 | 0.5668232 | 0.319 | 0.142 | 2.40E-11 |
| Trib1    | 1.88E-15 | 0.4667091 | 0.628 | 0.441 | 3.06E-11 |
| Tcn2     | 2.88E-15 | 0.582866  | 0.296 | 0.122 | 4.70E-11 |
| Hacd4    | 4.08E-15 | 0.5944462 | 0.251 | 0.093 | 6.65E-11 |
| Slc11a1  | 8.31E-15 | 0.6128317 | 0.324 | 0.151 | 1.35E-10 |
| Pirb     | 2.07E-14 | 0.4821565 | 0.473 | 0.283 | 3.38E-10 |
| Ctsd     | 2.09E-14 | 0.4365001 | 0.793 | 0.668 | 3.40E-10 |
| Sidt2    | 2.33E-14 | 0.5770115 | 0.258 | 0.102 | 3.79E-10 |
| Ube2b    | 2.62E-14 | 0.4245767 | 0.646 | 0.473 | 4.27E-10 |
| Samsn1   | 2.95E-14 | 0.3937867 | 0.807 | 0.656 | 4.81E-10 |
| H2-T23   | 3.82E-14 | 0.5850378 | 0.316 | 0.149 | 6.23E-10 |
| Sp100    | 5.35E-14 | 0.5893386 | 0.257 | 0.102 | 8.71E-10 |
| Slfn1    | 5.63E-14 | 0.5277458 | 0.418 | 0.237 | 9.17E-10 |
| Rnf11    | 9.58E-14 | 0.558505  | 0.348 | 0.177 | 1.56E-09 |
| Hif1a    | 1.01E-13 | 0.5516845 | 0.34  | 0.174 | 1.64E-09 |
| Ddx6     | 1.21E-13 | 0.5229253 | 0.619 | 0.484 | 1.98E-09 |
| Cd44     | 1.35E-13 | 0.3173506 | 0.881 | 0.766 | 2.20E-09 |
| Per1     | 1.57E-13 | 0.5571419 | 0.339 | 0.174 | 2.56E-09 |
| Cd53     | 2.66E-13 | 0.3143613 | 0.824 | 0.693 | 4.34E-09 |
| Cwc25    | 2.87E-13 | 0.7425001 | 0.306 | 0.149 | 4.68E-09 |
| Nr3c1    | 5.05E-13 | 0.5105428 | 0.351 | 0.187 | 8.23E-09 |
| Osgin1   | 5.68E-13 | 0.5670304 | 0.324 | 0.16  | 9.26E-09 |
| Xylt1    | 7.48E-13 | 0.488502  | 0.315 | 0.151 | 1.22E-08 |
| Igf1r    | 8.60E-13 | 0.5101146 | 0.507 | 0.341 | 1.40E-08 |
| Il1rap   | 8.96E-13 | 0.6140128 | 0.313 | 0.16  | 1.46E-08 |
| Baz2b    | 9.39E-13 | 0.4893006 | 0.404 | 0.234 | 1.53E-08 |
| Raf1     | 1.91E-12 | 0.5024762 | 0.29  | 0.137 | 3.10E-08 |
| Tgoln1   | 2.15E-12 | 0.5873083 | 0.455 | 0.3   | 3.50E-08 |
| Themis2  | 2.89E-12 | 0.4758651 | 0.33  | 0.17  | 4.72E-08 |
| Dgat1    | 3.26E-12 | 0.6109458 | 0.291 | 0.143 | 5.31E-08 |
| Stx11    | 3.26E-12 | 0.704645  | 0.279 | 0.137 | 5.31E-08 |
| Cytip    | 3.35E-12 | 0.3969438 | 0.603 | 0.44  | 5.46E-08 |
| Myl12b   | 3.82E-12 | 0.3716999 | 0.631 | 0.489 | 6.22E-08 |
| Cdc42ep3 | 5.39E-12 | 0.6433138 | 0.258 | 0.114 | 8.79E-08 |
| Dmxl2    | 5.42E-12 | 0.5518034 | 0.304 | 0.154 | 8.83E-08 |
| Ptgs2os2 | 7.20E-12 | 0.5685251 | 0.312 | 0.163 | 1.17E-07 |
| Tgfb1    | 7.75E-12 | 0.4073444 | 0.525 | 0.358 | 1.26E-07 |

|          |          |           |       |       |          |
|----------|----------|-----------|-------|-------|----------|
| Tnrc6b   | 9.31E-12 | 0.4605167 | 0.466 | 0.298 | 1.52E-07 |
| Il1r2    | 1.21E-11 | 0.3381715 | 0.893 | 0.767 | 1.97E-07 |
| Tnfrsf1a | 1.84E-11 | 0.4050739 | 0.494 | 0.324 | 2.99E-07 |
| Sik1     | 2.00E-11 | 0.4583134 | 0.304 | 0.155 | 3.25E-07 |
| Fam32a   | 3.24E-11 | 0.4479572 | 0.385 | 0.233 | 5.29E-07 |
| B2m      | 3.44E-11 | 0.2749248 | 0.943 | 0.881 | 5.61E-07 |
| Ssh2     | 4.23E-11 | 0.3647779 | 0.591 | 0.429 | 6.90E-07 |
| Trf      | 4.85E-11 | 0.5665764 | 0.252 | 0.119 | 7.90E-07 |
| Abr      | 4.96E-11 | 0.4676704 | 0.37  | 0.216 | 8.09E-07 |
| Trem1    | 6.18E-11 | 0.4250618 | 0.713 | 0.594 | 1.01E-06 |
| Rabgef1  | 1.05E-10 | 0.4238073 | 0.564 | 0.428 | 1.70E-06 |
| Cux1     | 1.18E-10 | 0.4815294 | 0.364 | 0.216 | 1.92E-06 |
| Psap     | 1.33E-10 | 0.3962949 | 0.66  | 0.533 | 2.16E-06 |
| Arpc3    | 1.43E-10 | 0.3115648 | 0.822 | 0.709 | 2.33E-06 |
| Gm5483   | 1.51E-10 | 1.1763132 | 0.281 | 0.151 | 2.47E-06 |
| Gm5150   | 1.77E-10 | 0.4066884 | 0.324 | 0.172 | 2.89E-06 |
| Nsd3     | 2.04E-10 | 0.4428162 | 0.455 | 0.309 | 3.33E-06 |
| Tiparp   | 2.17E-10 | 0.58739   | 0.322 | 0.18  | 3.53E-06 |
| Smap2    | 2.17E-10 | 0.459471  | 0.294 | 0.155 | 3.53E-06 |
| Fmnl1    | 4.01E-10 | 0.4086138 | 0.345 | 0.201 | 6.53E-06 |
| Anxa2    | 4.45E-10 | 0.3329549 | 0.679 | 0.572 | 7.26E-06 |
| Diaph1   | 5.20E-10 | 0.4282019 | 0.524 | 0.384 | 8.47E-06 |
| Lilrb4a  | 6.38E-10 | 0.3654681 | 0.512 | 0.367 | 1.04E-05 |
| Atf3     | 8.38E-10 | 0.4007455 | 0.594 | 0.437 | 1.37E-05 |
| Fem1c    | 8.88E-10 | 0.3335642 | 0.475 | 0.314 | 1.45E-05 |
| Gm34084  | 9.10E-10 | 0.4725656 | 0.336 | 0.193 | 1.48E-05 |
| Adipor1  | 9.46E-10 | 0.3290483 | 0.664 | 0.527 | 1.54E-05 |
| Arpc5    | 9.99E-10 | 0.2980353 | 0.684 | 0.565 | 1.63E-05 |
| Snx20    | 1.08E-09 | 0.3439258 | 0.528 | 0.373 | 1.76E-05 |
| Kras     | 1.22E-09 | 0.3808269 | 0.388 | 0.242 | 2.00E-05 |
| Ppp1r3b  | 2.14E-09 | 0.4563939 | 0.251 | 0.126 | 3.48E-05 |
| Tmcc1    | 2.39E-09 | 0.4619468 | 0.393 | 0.254 | 3.90E-05 |
| Sdcbp    | 2.61E-09 | 0.2722756 | 0.827 | 0.732 | 4.25E-05 |
| G0s2     | 2.72E-09 | 0.6004985 | 0.519 | 0.373 | 4.43E-05 |
| Hmgb2    | 3.41E-09 | 0.3421397 | 0.664 | 0.56  | 5.56E-05 |
| Plaur    | 3.49E-09 | 0.5530572 | 0.487 | 0.365 | 5.68E-05 |
| Trim12a  | 3.73E-09 | 0.5209816 | 0.261 | 0.139 | 6.07E-05 |
| Pygl     | 3.80E-09 | 0.3626497 | 0.494 | 0.356 | 6.19E-05 |
| Gmfg     | 5.28E-09 | 0.266489  | 0.776 | 0.659 | 8.61E-05 |
| Nup98    | 5.30E-09 | 0.4280891 | 0.391 | 0.256 | 8.64E-05 |
| 7-Mar    | 6.84E-09 | 0.3559774 | 0.685 | 0.584 | 1.11E-04 |
| Sbno2    | 7.25E-09 | 0.4633506 | 0.328 | 0.199 | 1.18E-04 |
| Apbb1ip  | 8.28E-09 | 0.3443977 | 0.53  | 0.39  | 1.35E-04 |

|             |          |           |       |       |          |
|-------------|----------|-----------|-------|-------|----------|
| Fth1        | 1.01E-08 | 0.2665746 | 0.999 | 1     | 1.65E-04 |
| Dusp16      | 1.03E-08 | 0.4198922 | 0.312 | 0.177 | 1.68E-04 |
| Antxr2      | 1.10E-08 | 0.4280011 | 0.391 | 0.254 | 1.79E-04 |
| Ptgs2       | 1.27E-08 | 0.2697111 | 0.663 | 0.507 | 2.08E-04 |
| Prdx5       | 1.86E-08 | 0.309268  | 0.763 | 0.705 | 3.03E-04 |
| Pbx1        | 2.41E-08 | 0.4513709 | 0.282 | 0.164 | 3.93E-04 |
| Ifi2712a    | 2.66E-08 | 0.7230321 | 0.281 | 0.164 | 4.34E-04 |
| Lsp1        | 2.84E-08 | 0.2739546 | 0.831 | 0.75  | 4.63E-04 |
| Cd14        | 3.00E-08 | 0.4647818 | 0.472 | 0.338 | 4.88E-04 |
| Emd         | 3.51E-08 | 0.4234798 | 0.324 | 0.205 | 5.72E-04 |
| Map2k3      | 3.63E-08 | 0.3924819 | 0.378 | 0.254 | 5.91E-04 |
| Lyz2        | 4.63E-08 | 0.3076283 | 0.761 | 0.68  | 7.54E-04 |
| Zcchc6      | 5.43E-08 | 0.31433   | 0.69  | 0.583 | 8.86E-04 |
| Cpd         | 6.68E-08 | 0.4357795 | 0.276 | 0.161 | 1.09E-03 |
| Trps1       | 7.89E-08 | 0.3446763 | 0.34  | 0.21  | 1.29E-03 |
| Hnrnph2     | 1.22E-07 | 0.3441888 | 0.39  | 0.268 | 1.98E-03 |
| Ptp4a1      | 1.51E-07 | 0.311192  | 0.625 | 0.501 | 2.46E-03 |
| Msl1        | 1.69E-07 | 0.2820181 | 0.261 | 0.145 | 2.76E-03 |
| Nr4a3       | 3.84E-07 | 0.4084451 | 0.425 | 0.295 | 6.26E-03 |
| 2310001H17I | 3.88E-07 | 0.2861997 | 0.499 | 0.373 | 6.32E-03 |
| Ilgam       | 3.98E-07 | 0.3109874 | 0.548 | 0.429 | 6.48E-03 |
| Clk1        | 4.67E-07 | 0.2742105 | 0.557 | 0.437 | 7.60E-03 |
| Cdc42se1    | 4.99E-07 | 0.3755912 | 0.251 | 0.148 | 8.13E-03 |
| Mpc1        | 6.21E-07 | 0.3514935 | 0.336 | 0.224 | 1.01E-02 |
| Spag9       | 6.56E-07 | 0.2957821 | 0.678 | 0.588 | 1.07E-02 |
| 1600010M07  | 6.64E-07 | 0.3311683 | 0.293 | 0.184 | 1.08E-02 |
| Lrrfip1     | 7.40E-07 | 0.2709742 | 0.494 | 0.374 | 1.21E-02 |
| Efhd2       | 1.50E-06 | 0.3046036 | 0.636 | 0.542 | 2.44E-02 |
| Lyst        | 2.53E-06 | 0.2925603 | 0.667 | 0.581 | 4.12E-02 |
| Ccl4        | 2.91E-06 | 0.5209606 | 0.413 | 0.307 | 4.74E-02 |
| Stat3       | 4.10E-06 | 0.258027  | 0.545 | 0.451 | 6.68E-02 |
| Ago2        | 5.18E-06 | 0.2806479 | 0.488 | 0.387 | 8.45E-02 |
| Gcnt2       | 6.07E-06 | 0.3082428 | 0.493 | 0.384 | 9.88E-02 |
| Spi1        | 6.10E-06 | 0.2503554 | 0.645 | 0.565 | 9.93E-02 |
| Tnrc18      | 6.14E-06 | 0.3153834 | 0.334 | 0.23  | 1.00E-01 |
| Ptafr       | 6.43E-06 | 0.2585978 | 0.64  | 0.528 | 1.05E-01 |
| Rab8b       | 7.25E-06 | 0.325133  | 0.422 | 0.327 | 1.18E-01 |
| Anxa11      | 7.70E-06 | 0.3416099 | 0.252 | 0.161 | 1.25E-01 |
| Akap13      | 9.03E-06 | 0.3102808 | 0.506 | 0.416 | 1.47E-01 |
| Kdm7a       | 9.40E-06 | 0.3035571 | 0.578 | 0.479 | 1.53E-01 |
| Dennd5a     | 1.01E-05 | 0.2834519 | 0.33  | 0.23  | 1.65E-01 |
| Tra2a       | 1.02E-05 | 0.4073068 | 0.512 | 0.422 | 1.67E-01 |
| Atp6v0d1    | 1.07E-05 | 0.318317  | 0.3   | 0.201 | 1.74E-01 |

|          |          |           |       |       |          |
|----------|----------|-----------|-------|-------|----------|
| Gng2     | 1.68E-05 | 0.2806499 | 0.285 | 0.189 | 2.73E-01 |
| Glrx     | 2.15E-05 | 0.3144559 | 0.263 | 0.169 | 3.50E-01 |
| Pgk1     | 2.46E-05 | 0.3147719 | 0.252 | 0.16  | 4.01E-01 |
| Anxa1    | 2.56E-05 | 0.3569852 | 0.366 | 0.272 | 4.17E-01 |
| Nisch    | 2.82E-05 | 0.350604  | 0.304 | 0.213 | 4.60E-01 |
| Vps4b    | 3.15E-05 | 0.3020675 | 0.396 | 0.303 | 5.13E-01 |
| Snap23   | 3.39E-05 | 0.2760551 | 0.548 | 0.467 | 5.53E-01 |
| Pag1     | 4.09E-05 | 0.2769252 | 0.313 | 0.221 | 6.67E-01 |
| Svil     | 4.58E-05 | 0.369336  | 0.251 | 0.17  | 7.46E-01 |
| Arhgap45 | 5.70E-05 | 0.2887211 | 0.321 | 0.233 | 9.29E-01 |
| Zfand5   | 5.78E-05 | 0.3243159 | 0.518 | 0.435 | 9.42E-01 |
| Csf2ra   | 6.47E-05 | 0.2759189 | 0.463 | 0.382 | 1.00E+00 |
| Gpi1     | 8.70E-05 | 0.2774952 | 0.334 | 0.247 | 1.00E+00 |
| Ogt      | 2.01E-04 | 0.2772629 | 0.427 | 0.352 | 1.00E+00 |
| Cfap43   | 2.45E-04 | 0.271467  | 0.301 | 0.222 | 1.00E+00 |
| Jdp2     | 4.22E-04 | 0.2752812 | 0.401 | 0.324 | 1.00E+00 |
| Sde2     | 4.72E-04 | 0.2902741 | 0.393 | 0.318 | 1.00E+00 |
| Tes      | 4.98E-04 | 0.3210798 | 0.252 | 0.18  | 1.00E+00 |
| Mef2d    | 5.34E-04 | 0.265803  | 0.3   | 0.227 | 1.00E+00 |
| Lpin2    | 6.56E-04 | 0.2903655 | 0.304 | 0.228 | 1.00E+00 |
| Srpk2    | 7.19E-04 | 0.2703028 | 0.278 | 0.205 | 1.00E+00 |
| Sbno1    | 8.02E-04 | 0.3200297 | 0.448 | 0.394 | 1.00E+00 |
| Mirt1    | 1.73E-03 | 0.2956434 | 0.403 | 0.336 | 1.00E+00 |

**Figure S1. Experimental design and bioinformatics protocol.**



(A) Experimental design and flow cytometry panel implemented to isolate leukocytes from steady-state and post-infarct heart tissue. (B) After FACS sorting, single cell suspensions were subjected to custom inDrop or commercial 10X Genomics single barcoding and processed through standard library preparation sequencing. Following gene alignment and demultiplexing, the resulting counts matrices were integrated. Neutrophils were identified based on the concerted expression of several canonical neutrophil markers and re-integrated from the original datasets.

**Figure S2. scRNA-seq quality control metrics for post-MI time points.**



**(A)** Violin plots of post-QC UMI counts (total transcript count) and number of unique genes per neutrophil at steady state (D0) and after MI (D1, D2, D4). **(B)** Time point-specific information on cardiac scRNA-seq samples.

**Figure S3. inDrop and 10X (Genomics) platform comparison.**



**(A)** UMAPs of the resulting integration, colored by cluster, separated by sample and day. **(B)** Platform comparison of fractional cluster membership.

Figure S4. Assessment of quantity of genes implemented for subset-specific scores.



(A) Respective clusters scores subtracted from reference group (Retnlg<sup>HI</sup>) as a function of genes (color-coded). (B) Percentage of dropouts, defined as the number cells within a cluster with a score equal to 0, as a function of number of genes considered in score.

**Figure S5. Characteristic flow cytometric scatter profiles of SiglecF<sup>HI</sup> neutrophils, SiglecF<sup>LO</sup> neutrophils, doublets, and eosinophils.**



**(A)** Representative histograms of side scatter (SSC) and forward scatter (FSC) for each population. All populations were isolated from the heart of one mouse on post-MI D4. **(B)** Geometric means of SSC and FSC for each population (n=3, mean  $\pm$  S.E.M).

Figure S6. Eosinophil marker gene expression in bone marrow and blood neutrophils.

**A**



(A) Violin plots of eosinophil marker genes applied to neutrophils as detailed in Figure S6.

**Figure S7. Myc-target genes decrease during granulopoiesis but are recovered in SigF<sup>HI</sup> cardiac neutrophils.**



**(A)** Experimental design. **(B)** Feature plot of Myc score with neutrophil progenitors annotated and arrow indicating axis of maturation (n = 1 mouse, 6191 cells). **(C)** Bar plot of Myc score binned by stages of neutrophil development. Data shown are mean ± SEM of single cell values. **(D)** Diagram indicating Myc-recovery in cardiac SigF<sup>HI</sup> neutrophils.

**Figure S8. SigF<sup>HI</sup> neutrophils subset into NFkB HI and NFkB Intermediate -induced state.**



**(A)** Scatterplot of SiglecF score: Retnlg score ratio vs. NFkB score in all cardiac neutrophils. **(B)** GSEA of genes upregulated in the NFkB/TNF<sup>HI</sup> subset of SiglecF<sup>HI</sup> neutrophils using gProfiler. **(C)** Heatmap of subclustered SigF<sup>HI</sup> neutrophils from D4 post-MI, displaying emergence of 2 clusters based on differential expression of NFkB/TNF related genes. **(D)** Violin plots of subsets displayed in (C), showing universally high expression of *SiglecF* but dichotomous expression of NFkB-regulated genes.

**Figure S9. Integration of bone marrow and blood neutrophils transcriptomes reveals an axis of maturation that continues into blood.**



(A) Bone marrow and blood leukocytes were harvested from mice with (bone marrow: D1, D2; blood: D1, D2, D4) and without MIs (D0) and processed through single cell pipeline (10X Genomics) as described above. (B) Fractional representation of clusters by tissue and day post-MI. (C) UMAP plots split by sample (15,839 cells in total). (D) Violin plots of SigF<sup>HI</sup> associated genes.
